# Supplementary material
Source: PubMed Central journal article supplement (PMC5233908)
Supplement: supp_glw072_Supplementary.pdf [file supp_glw072_Supplementary.pdf]

## Supplementary Material

**Supplementary Table 1.** Summary of survival statistics.

| Genotype                              | Sex     | Diet | N (flies)           |                 |        | Median lifespan (d) |       |                               | Fisher's exact test          | Log-rank                     |
|---------------------------------------|---------|------|---------------------|-----------------|--------|---------------------|-------|-------------------------------|------------------------------|------------------------------|
|                                       |         |      | Yeast extract (w/v) | Vehicle         | RU486* | Vehicle             | RU486 | Difference                    | <i>p</i>                     | <i>p</i>                     |
| <i>Act5C-GS/UAS-GFP</i><br>(Figure 1) | M       | 0.1% | 59                  | 60              | 77     | 66                  | -14%  | <b>1.1 × 10<sup>-5</sup></b>  | <b>3.9 × 10<sup>-9</sup></b> |                              |
|                                       | M       | 0.5% | 59                  | 56              | 70     | 63                  | -10%  | <b>0.016</b>                  | 0.054                        |                              |
|                                       | M       | 5%   | 59                  | 58              | 49     | 49                  | 0%    | 0.85                          | 0.59                         |                              |
| <i>Act5C-GS/+</i>                     | M       | 0.1% | 60                  | 60              | 56     | 52                  | -7%   | <b>0.010</b>                  | <b>0.013</b>                 |                              |
|                                       | M       | 0.5% | 60                  | 59              | 52     | 49                  | -6%   | <b>0.028</b>                  | <b>0.0010</b>                |                              |
|                                       | M       | 5%   | 60                  | 60              | 45     | 45                  | 0%    | 0.69                          | 0.47                         |                              |
| Canton-S                              | M       | 0.1% | 60                  | 58              | 63     | 56                  | -11%  | <b>5.5 × 10<sup>-6</sup></b>  | <b>5.7 × 10<sup>-7</sup></b> |                              |
|                                       | M       | 0.5% | 60                  | 60              | 56     | 52                  | -7%   | 1.0                           | 0.57                         |                              |
|                                       | M       | 5%   | 60                  | 60              | 45     | 49                  | 9%    | <b>0.00020</b>                | <b>5.6 × 10<sup>-6</sup></b> |                              |
| Dahomey                               | M       | 0.1% | 58                  | 61              | 38     | 31                  | -18%  | <b>1.2 × 10<sup>-11</sup></b> | <b>&lt;10<sup>-10</sup></b>  |                              |
|                                       | M       | 0.5% | 59                  | 60              | 42     | 38                  | -10%  | <b>0.0042</b>                 | <b>0.0021</b>                |                              |
|                                       | M       | 5%   | 59                  | 60              | 31     | 35                  | 13%   | 1.0                           | 0.46                         |                              |
| Dahomey<br>(Figure 2)                 | Trial 2 | M    | 0.1%                | 60              | 59     | 45                  | 38    | -16%                          | <b>0.0013</b>                | <b>0.00030</b>               |
|                                       | Trial 3 | M    | 0.1%                | 61              | 59     | 49                  | 39    | -20%                          | <b>3.5 × 10<sup>-8</sup></b> | <b>1.4 × 10<sup>-6</sup></b> |
|                                       | Trial 4 | M    | 0.1%                | 60              | 58     | 42                  | 35    | -17%                          | <b>1.5 × 10<sup>-6</sup></b> | <b>9.1 × 10<sup>-6</sup></b> |
| Axenic Dahomey                        | M       | 0.1% | 60                  | 60              | 31     | 24                  | -23%  | <b>2.1 × 10<sup>-8</sup></b>  | <b>&lt;10<sup>-10</sup></b>  |                              |
|                                       | M       | 0.5% | 60                  | 57              | 45     | 42                  | -7%   | 1.0                           | 0.25                         |                              |
|                                       | M       | 5%   | 60                  | 59              | 38     | 42                  | 11%   | <b>0.0059</b>                 | <b>0.039</b>                 |                              |
| Dahomey<br>(Figure 3)                 | F       | 0.1% | 59                  | 59 <sup>†</sup> | 63     | 56                  | -11%  | 0.097                         | 0.079                        |                              |
|                                       | F       | 0.1% |                     | 61 <sup>‡</sup> |        | 42                  | -33%  | <b>0.00020</b>                | <b>0.00040</b>               |                              |
|                                       | F       | 5%   | 61                  | 61 <sup>†</sup> | 63     | 63                  | 0%    | 0.72                          | 0.39                         |                              |
| Canton-S                              | F       | 5%   |                     | 58 <sup>‡</sup> |        | 66                  | 5%    | 0.20                          | 0.40                         |                              |
|                                       | F       | 0.1% | 62                  | 58 <sup>†</sup> | 63     | 59                  | -6%   | 1.0                           | 0.36                         |                              |
|                                       | F       | 0.1% |                     | 59 <sup>‡</sup> |        | 59                  | -6%   | <b>0.0032</b>                 | <b>0.00020</b>               |                              |
|                                       | F       | 5%   | 59                  | 61 <sup>†</sup> | 49     | 49                  | 0%    | 0.26                          | 0.16                         |                              |
|                                       | F       | 5%   |                     | 58 <sup>‡</sup> |        | 49                  | 0%    | <b>0.0029</b>                 | <b>0.021</b>                 |                              |
| Canton-S                              | M       | 0.1% | 55                  | 58 <sup>†</sup> | 52     | 45                  | -13%  | <b>0.023</b>                  | <b>0.0092</b>                |                              |
|                                       | M       | 0.1% |                     | 58 <sup>‡</sup> |        | 31                  | -40%  | <b>3.5 × 10<sup>-11</sup></b> | <b>&lt;10<sup>-10</sup></b>  |                              |
| Dahomey<br>(Supp. Figure 2)           | M       | 5%   | 57                  | 60 <sup>‡</sup> | 38     | 38                  | 0%    | 1.0                           | 0.50                         |                              |

\*Unless otherwise noted, RU486 was supplemented at 200 μM.

<sup>†</sup>100 μM RU486.

<sup>‡</sup>400 μM RU486.

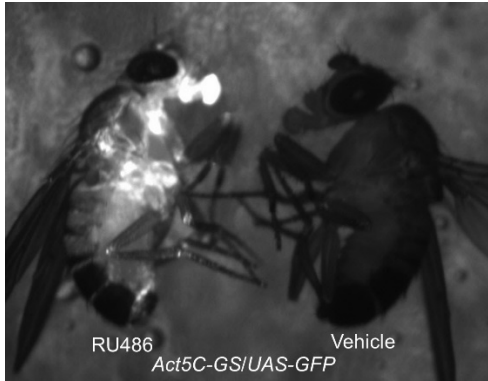

**Supplementary Figure 1.** Representative GFP fluorescence in *Act5C-GS/UAS-GFP* flies fed food supplemented with 200  $\mu$ M RU486 (left) or vehicle control (right).

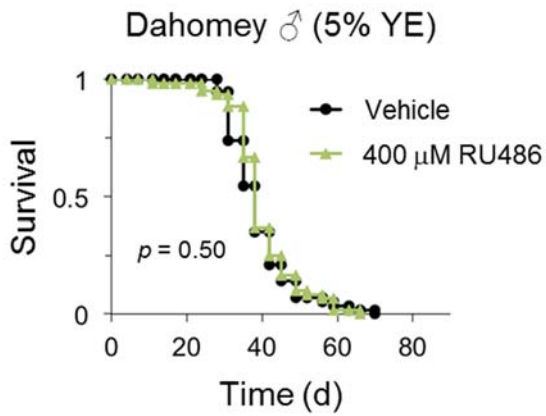

**Supplementary Figure 2.** Survival of Dahomey males on 5% YE diet supplemented with 400  $\mu$ M RU486 or vehicle. Log-rank  $p$  value between survival curves is shown.  $N = 57$  (vehicle) or 60 (RU486) flies per condition. See Supplementary Table 1 for statistics. YE, yeast extract.
